# Supplementary material
Source: HighWire-hosted journal article supplement (https://ard.bmj.com/content/78/9/1151)
Supplement: inline-supplementary-material-1 [file inline-supplementary-material-1.pdf]

**Supplementary Table 1.** Multiphase development of SLE classification criteria

| <b>Phase 1b<br/>Delphi Exercise</b>                                      | <b>Phase 1c<br/>Early cohort study</b> | <b>Phase 1d<br/>Patient survey<br/>(all with a<br/>prevalence of<br/>&gt;50%)</b> | <b>Phase 2b<br/>Consensus meeting<br/>using nominal group<br/>technique<br/>(recommended<br/>definition)</b> | <b>Phase 3a Criteria<br/>refining</b> | <b>Final criteria</b>                                  |
|--------------------------------------------------------------------------|----------------------------------------|-----------------------------------------------------------------------------------|--------------------------------------------------------------------------------------------------------------|---------------------------------------|--------------------------------------------------------|
| ANA on HEp2 cells with a pattern compatible with SLE, titer $\geq 1:160$ | ANA                                    | ANA (95%)                                                                         | ANA $\geq 1:80$ (HEp2 IF)                                                                                    | ANA $\geq 1:80$ (HEp2 IF)             | ANA $\geq 1:80$ HEp2 IF or an equivalent positive test |
| ANA positive $\geq 1:160$ (any pattern)                                  |                                        |                                                                                   |                                                                                                              |                                       |                                                        |
| ANA positive by HEp 2 IF                                                 |                                        |                                                                                   |                                                                                                              |                                       |                                                        |
|                                                                          | fever***                               | fever (54%)                                                                       | fever (to be defined)                                                                                        | fever $>38.3^{\circ}\text{C}$         | fever $>38.3^{\circ}\text{C}$                          |
|                                                                          | fatigue (neg)                          | fatigue (89%)                                                                     |                                                                                                              |                                       |                                                        |
|                                                                          | weight loss                            |                                                                                   |                                                                                                              |                                       |                                                        |
| Raynaud's phenomenon                                                     | Raynaud's phenomenon (neg)***          | Raynaud's phenomenon (52%)                                                        |                                                                                                              |                                       |                                                        |
|                                                                          | dry eyes (neg)***                      |                                                                                   |                                                                                                              |                                       |                                                        |
|                                                                          | dry mouth (neg)***                     |                                                                                   |                                                                                                              |                                       |                                                        |
|                                                                          | dysphagia (neg)                        |                                                                                   |                                                                                                              |                                       |                                                        |
| lymphopenia ( $<1500/\text{mm}^3$ on 2 or more occasions)                |                                        |                                                                                   |                                                                                                              |                                       |                                                        |
| lymphopenia ( $<1000/\text{mm}^3$ on 2 or more occasions)                |                                        |                                                                                   |                                                                                                              |                                       |                                                        |
| leukopenia ( $<4000/\text{mm}^3$ on 2 or more occasions)                 | leukopenia                             |                                                                                   | leukopenia ( $<4000/\text{mm}^3$ on 2 or more occasions)                                                     | leukopenia (to be tested)             | leukopenia ( $<4000/\text{mm}^3$ once)                 |
| thrombocytopenia                                                         |                                        |                                                                                   | thrombocytopenia ( $<100,000$ twice)                                                                         | thrombocytopenia ( $<100,000$ once)   | thrombocytopenia ( $<100,000$ once)                    |
| thrombocytopenia (severe)                                                |                                        |                                                                                   |                                                                                                              |                                       |                                                        |
| autoimmune hemolytic anemia                                              | Coombs test                            |                                                                                   | autoimmune hemolytic anemia                                                                                  | autoimmune hemolytic anemia           | autoimmune hemolytic anemia                            |

| Phase 1b<br>Delphi Exercise                                                                   | Phase 1c<br>Early cohort study    | Phase 1d<br>Patient survey<br>(all with a<br>prevalence of<br>>50%) | Phase 2b<br>Consensus meeting<br>using nominal group<br>technique (provisional<br>definition)                             | Phase 3a Criteria<br>refining                      | Final criteria                                     |
|-----------------------------------------------------------------------------------------------|-----------------------------------|---------------------------------------------------------------------|---------------------------------------------------------------------------------------------------------------------------|----------------------------------------------------|----------------------------------------------------|
| CNS dysfunction<br>(seizures, psychosis,<br>chorea or acute<br>confusional state)             | neurological<br>involvement (ACR) |                                                                     | CNS manifestations<br>(seizures, psychosis,<br>chorea, myelitis, optic<br>neuritis, stroke or acute<br>confusional state) | delirium                                           | delirium                                           |
|                                                                                               |                                   |                                                                     |                                                                                                                           | psychosis                                          | psychosis                                          |
|                                                                                               | CNS at least one                  |                                                                     |                                                                                                                           | seizure                                            | seizure                                            |
|                                                                                               |                                   |                                                                     |                                                                                                                           | mononeuropathy                                     |                                                    |
|                                                                                               | cranial neuropathy                |                                                                     |                                                                                                                           |                                                    |                                                    |
| alopecia with associated<br>scalp inflammation                                                | alopecia***                       | alopecia (51%)                                                      | alopecia with associated<br>scalp inflammation                                                                            | non-scarring<br>alopecia                           | non-scarring<br>alopecia                           |
| oral mucosal lesions on the<br>hard palate                                                    | oral ulcer***                     |                                                                     | oral mucosal lesions on<br>the hard palate                                                                                | oral ulcers                                        | oral ulcers                                        |
| photosensitivity                                                                              | photosensitivity***               | photosensitivity<br>(79%)                                           |                                                                                                                           |                                                    |                                                    |
| photosensitive rash                                                                           |                                   |                                                                     |                                                                                                                           |                                                    |                                                    |
| acute, subacute, or chronic<br>lupus rash                                                     |                                   | skin rash (71%)                                                     |                                                                                                                           |                                                    |                                                    |
| lupus profundus                                                                               |                                   |                                                                     | included in chronic<br>cutaneous lupus                                                                                    |                                                    |                                                    |
| discoid rash                                                                                  |                                   |                                                                     | chronic cutaneous lupus                                                                                                   | SCLE or<br>discoid lupus                           | SCLE or<br>discoid lupus                           |
| SCLE                                                                                          |                                   |                                                                     | included in ACLE                                                                                                          |                                                    |                                                    |
| malar rash                                                                                    | malar rash***                     |                                                                     | acute cutaneous lupus                                                                                                     | malar rash or<br>generalized<br>maculopapular rash | malar rash or<br>generalized<br>maculopapular rash |
| rash with dermoepidermal<br>interface changes and Ig<br>and/or complement<br>deposition on IF |                                   |                                                                     | rash with dermo-<br>epidermal interface<br>changes and/or Ig<br>and/or complement<br>deposition on IF                     | included into<br>ACLE, SCLE,<br>discoid lupus      | included into<br>ACLE, SCLE,<br>discoid lupus      |

| Phase 1b<br>Delphi Exercise                                                     | Phase 1c<br>Early cohort study | Phase 1d<br>Patient survey<br>(all with a<br>prevalence of<br>>50%) | Phase 2b<br>Consensus meeting<br>using nominal group<br>technique (provisional<br>definition) | Phase 3a Criteria<br>refining      | Final criteria                       |
|---------------------------------------------------------------------------------|--------------------------------|---------------------------------------------------------------------|-----------------------------------------------------------------------------------------------|------------------------------------|--------------------------------------|
| serositis (clinical signs, or<br>pleural or pericardial<br>effusion by imaging) | serositis***                   |                                                                     | serositis (pleural,<br>pericardial effusion,<br>pleurisy, pericarditis,<br>peritonitis)       | pleural or<br>pericardial effusion | pleural or<br>pericardial effusion   |
| pleural effusion                                                                |                                |                                                                     |                                                                                               | acute pericarditis                 | acute pericarditis                   |
| pleuritis                                                                       |                                |                                                                     |                                                                                               |                                    |                                      |
| pericardial effusion                                                            | pericarditis***                |                                                                     |                                                                                               |                                    |                                      |
|                                                                                 |                                | myalgia (76%)                                                       |                                                                                               |                                    |                                      |
| arthritis                                                                       | inflammatory<br>arthritis***   | joint pain (87%)                                                    | arthritis (to be defined)                                                                     | arthritis (to be<br>tested)        | joint involvement                    |
|                                                                                 | arthralgia (negative)          |                                                                     |                                                                                               |                                    |                                      |
|                                                                                 | kidney<br>involvement***       |                                                                     |                                                                                               |                                    |                                      |
|                                                                                 | hypertension                   |                                                                     |                                                                                               |                                    |                                      |
| persistent proteinuria<br>(>0.5g/day)                                           |                                |                                                                     | persistent proteinuria<br>(≥0.5g/day)                                                         | proteinuria >0.5<br>g/24h          | proteinuria >0.5<br>g/24h            |
|                                                                                 | peripheral edema               |                                                                     |                                                                                               |                                    |                                      |
| urine cellular casts                                                            |                                |                                                                     |                                                                                               |                                    |                                      |
| urinary RBC casts (≥ 1<br>cast/hpf)                                             |                                |                                                                     |                                                                                               |                                    |                                      |
| dysmorphic urinary RBC<br>or urinary RBC casts                                  |                                |                                                                     |                                                                                               |                                    |                                      |
| active urine sediment<br>(without UTI)                                          |                                |                                                                     | active urine sediment<br>(without UTI)                                                        |                                    |                                      |
| lupus nephritis by renal<br>biopsy with immune<br>deposits                      |                                |                                                                     | lupus nephritis by renal<br>biopsy with immune<br>deposits                                    | lupus nephritis by<br>ISN/RPS      | ISN/RPS class III<br>or IV nephritis |
|                                                                                 |                                |                                                                     |                                                                                               |                                    | ISN/RPS class II or<br>V nephritis   |

| Phase 1b<br>Delphi Exercise                                                                                         | Phase 1c<br>Early cohort study              | Phase 1d<br>Patient survey<br>(all with a<br>prevalence of<br>>50%) | Phase 2b<br>Consensus meeting<br>using nominal group<br>technique<br>(recommended<br>definition)                          | Phase 3a Criteria<br>refining                                                                                                           | Final criteria                                                                                                                                                                             |
|---------------------------------------------------------------------------------------------------------------------|---------------------------------------------|---------------------------------------------------------------------|---------------------------------------------------------------------------------------------------------------------------|-----------------------------------------------------------------------------------------------------------------------------------------|--------------------------------------------------------------------------------------------------------------------------------------------------------------------------------------------|
| APS (clinical signs/history<br>+ antibodies)                                                                        |                                             |                                                                     |                                                                                                                           |                                                                                                                                         |                                                                                                                                                                                            |
| antiphospholipid<br>antibodies (lupus anti-<br>coagulant, anti-cardiolipin,<br>anti-beta2GPI, or<br>prolonged RVVT) | anti-Cardiolipin<br>IgM***<br>anti-beta2GPI |                                                                     | anti-phospholipid<br>antibodies (lupus anti-<br>coagulant, anti-<br>cardiolipin, anti-<br>beta2GPI, or prolonged<br>RVVT) | anti-cardiolipin<br>IgG (>40 IgG<br>phospholipid units)<br>or anti-beta2GPI<br>IgG (>40 units) or<br>lupus<br>anticoagulant<br>positive | Anti-Cardiolipin<br>antibodies (IgA,<br>IgG, or IgM) at<br>medium or high<br>titer or positive<br>anti-beta2GPI<br>antibodies (IgA,<br>IgG, or IgM) or<br>positive lupus<br>anticoagulant. |
| positive lupus<br>anticoagulant panel                                                                               |                                             |                                                                     |                                                                                                                           |                                                                                                                                         |                                                                                                                                                                                            |
| low C3                                                                                                              | hypocomplementemi<br>a***                   |                                                                     | low C3 and/or C4                                                                                                          | low C3 OR low C4                                                                                                                        | low C3 OR low C4                                                                                                                                                                           |
| low C3 and C4                                                                                                       |                                             |                                                                     |                                                                                                                           | low C3 AND C4                                                                                                                           | low C3 AND C4                                                                                                                                                                              |
| anti-dsDNA antibody                                                                                                 | anti-dsDNA***                               | anti-dsDNA<br>(78%)                                                 | anti-dsDNA antibody                                                                                                       | anti-dsDNA<br>antibodies                                                                                                                | anti-dsDNA<br>antibodies                                                                                                                                                                   |
| anti-Sm antibody                                                                                                    | anti-Sm***                                  |                                                                     | anti-Sm antibody                                                                                                          | anti-Sm antibodies                                                                                                                      | anti-Sm antibodies                                                                                                                                                                         |
|                                                                                                                     | anti-RNP***                                 |                                                                     |                                                                                                                           |                                                                                                                                         |                                                                                                                                                                                            |
| presence of multiple<br>autoantibodies                                                                              |                                             |                                                                     | presence of multiple<br>autoantibodies (to be<br>defined)                                                                 |                                                                                                                                         |                                                                                                                                                                                            |

\*\*\* significant in univariate analysis

ACLE acute cutaneous lupus erythematosus

ACR American College of Rheumatology

ANA Antinuclear antibodies

anti-beta2GP1 anti-beta 2 glycoprotein 1 antibody

anti-dsDNA anti-double stranded DNA antibody

APS antiphospholipid antibody syndrome

CNS Central nervous system

HEp-2 IF Indirect immunofluorescence on human epithelial cells,

hpf high power field

Ig immunoglobulin

ISN/RPS International Society of Nephrology/Renal Pathology Society

(neg) denotes negative association, e.g. presence of fatigue is more common in control than SLE subjects

RVVT Russel viper venom time

SCLE subacute cutaneous lupus erythematosus

UTI urinary tract infection
